# Supplementary material for: Experimentally Verified Parameter Sets for Modelling Heterogeneous Neocortical Pyramidal-Cell Populations
Source: PLoS Comput Biol. 2015 Aug 20;11(8):e1004165. doi: 10.1371/journal.pcbi.1004165 (PMC4546387; doi:10.1371/journal.pcbi.1004165)
Supplement: S2 Computer Code — (M) [file pcbi.1004165.s002.m]

%%%%%%%%%%%%%%%%%%%%%%%%%%%%%%%%%%%%%%%%%%%%%%%%%%%%%%%%%%%%%%%%%%%%%%%%%%%
%
%     COPYRIGHT: 
%     Paul Harrison, Laurent Badel, Mark Wall and Magnus JE Richardson
%     (2014)
%     
%     This code is free software: you can redistribute it and/or modify
%     it under the terms of the GNU General Public License as published by
%     the Free Software Foundation version 3. 
% 
%     This program is distributed in the hope that it will be useful,
%     but WITHOUT ANY WARRANTY; without even the implied warranty of
%     MERCHANTABILITY or FITNESS FOR A PARTICULAR PURPOSE.  See the
%     GNU General Public License for more details.
% 
%     See <http://www.gnu.org/licenses/> for the GNU General Public License
%
%%%%%%%%%%%%%%%%%%%%%%%%%%%%%%%%%%%%%%%%%%%%%%%%%%%%%%%%%%%%%%%%%%%%%%%%%%%

function [ Data_gen_class,Variables ] = Generate_rEIF( N )
%GENERATEREIF Generate populations of rEIF neuron models of layer 2/3, 4,
%slender-tufted layer 5, and thick-tufted layer 5 pyramidal cells. Requires
%MATLAB Global Optimzation and Statistics toolboxes.
%   Input:
%       N = number of cells to generate. 4x1 vector consisting of the
%       number required for each class in the order stated above. If the
%       same number from each class are required just input a single
%       number.
%   Output:
%       Data_gen_class = 4x1 cell array where each element corresponds to 
%       the cell classes in the order stated above (Data_gen_class{1} are 
%       layer 2/3 cells etc.). Each element in the cell array is an N(k)*13
%       array of parameter values. Rows correspond to to model neurons and
%       columns are parameters 
%       [C,tau,E,VT,DT,g1,taug,VT1,tauT,E_A1,tau_E1,E_A2,tau_E2]. In the
%       case of cells with a mono-exponential decaying equilibrium
%       potential E_A1=0 and tau_E1=10. Refractory dynamics are measured
%       from 4ms after the spike peak (i.e. from after the refractory
%       period).
%       Variables = Cell array of variable names.

nClass=4;%Number of cell classes
if numel(N)==1
    N=N*ones(nClass,1);
end

%% Non-Eref Distribution Parameters
Variables_rEIF={'C';'tau';'E';'VT';'DT';'g1';'taug';'VT1';'tauT'};
nVar=numel(Variables_rEIF);%Number of EIF parameters
DistName={'logn';'logn';'norm';'norm';'logn';'logn';'logn';'logn';'logn'};
mu=[4.87 4.86 4.86 5.61;...C
    2.67 2.82 2.88 2.9;...tau
    -79.3 -71.8 -69.9 -68.5;...E
    -49.5 -48.7 -49.7 -52.7;...VT
    .227 .213 .235 .0836;...DT
    2.50 2.90 2.63 3.15;...g1
    2.62 2.65 2.87 2.99;...taug
    2.75 2.71 2.53 2.65;...VT1
    2.49 2.61 2.65 2.44];%tauT
sig=[.258 .289 .251 .273;...C
    .171 .24 .255 .229;...tau
    4.27 4.2 4.18 3.98;...E
    3.81 3.53 3.56 3.59;...VT
    .359 .266 .361 .364;...DT
    .616 .445 .528 .501;...g1
    .570 .578 .694 .635;...taug
    .286 .368 .296 .312;...VT1
    .442 .345 .479 .432];%tauT

Rho{1}=...
   [1.0000   -0.2721    0.0042   -0.5636   -0.1307    0.3344    0.1288    0.2781   -0.1811
   -0.2721    1.0000   -0.1357    0.4244   -0.4509   -0.0626   -0.1978   -0.3071   -0.0952
    0.0042   -0.1357    1.0000    0.4765   -0.0464   -0.1098    0.0114    0.0466    0.1897
   -0.5636    0.4244    0.4765    1.0000   -0.3097   -0.1693   -0.0708   -0.2542    0.1030
   -0.1307   -0.4509   -0.0464   -0.3097    1.0000   -0.1271   -0.0322    0.0376    0.5705
    0.3344   -0.0626   -0.1098   -0.1693   -0.1271    1.0000   -0.7359    0.2904   -0.0036
    0.1288   -0.1978    0.0114   -0.0708   -0.0322   -0.7359    1.0000   -0.2386   -0.1869
    0.2781   -0.3071    0.0466   -0.2542    0.0376    0.2904   -0.2386    1.0000   -0.3623
   -0.1811   -0.0952    0.1897    0.1030    0.5705   -0.0036   -0.1869   -0.3623    1.0000];
Rho{2}=...
   [1.0000    0.1124    0.2056   -0.2430   -0.1318    0.2828    0.1578    0.1787   -0.0830
    0.1124    1.0000    0.2773   -0.0053   -0.1034   -0.1876    0.4213    0.1560    0.0287
    0.2056    0.2773    1.0000    0.3427   -0.3416    0.2254    0.2933   -0.0635   -0.0035
   -0.2430   -0.0053    0.3427    1.0000   -0.4020   -0.1464    0.1829    0.1130   -0.2779
   -0.1318   -0.1034   -0.3416   -0.4020    1.0000    0.1131   -0.4755    0.0372    0.2555
    0.2828   -0.1876    0.2254   -0.1464    0.1131    1.0000   -0.5901    0.0257   -0.1920
    0.1578    0.4213    0.2933    0.1829   -0.4755   -0.5901    1.0000    0.0336   -0.0620
    0.1787    0.1560   -0.0635    0.1130    0.0372    0.0257    0.0336    1.0000   -0.5750
   -0.0830    0.0287   -0.0035   -0.2779    0.2555   -0.1920   -0.0620   -0.5750    1.0000];
Rho{3}=...
   [1.0000    0.3380    0.4681   -0.1710   -0.2218    0.2029    0.3500    0.0264   -0.1258
    0.3380    1.0000    0.2582   -0.0344   -0.2067    0.0681    0.3596   -0.2010    0.1171
    0.4681    0.2582    1.0000    0.3974   -0.4300    0.0924    0.3367   -0.1432   -0.3766
   -0.1710   -0.0344    0.3974    1.0000   -0.1410   -0.0874    0.0882    0.1301   -0.2095
   -0.2218   -0.2067   -0.4300   -0.1410    1.0000   -0.0274   -0.1694    0.0836    0.6912
    0.2029    0.0681    0.0924   -0.0874   -0.0274    1.0000   -0.6661   -0.1429   -0.0372
    0.3500    0.3596    0.3367    0.0882   -0.1694   -0.6661    1.0000   -0.0100    0.0137
    0.0264   -0.2010   -0.1432    0.1301    0.0836   -0.1429   -0.0100    1.0000   -0.1519
   -0.1258    0.1171   -0.3766   -0.2095    0.6912   -0.0372    0.0137   -0.1519    1.0000];
Rho{4}=...
   [1.0000    0.0639    0.1435   -0.2865   -0.2151    0.1435    0.2147   -0.0737   -0.0698
    0.0639    1.0000    0.0773   -0.0066   -0.2062    0.1547    0.1640    0.0313   -0.0202
    0.1435    0.0773    1.0000    0.3730    0.1508    0.2822    0.2144   -0.0188   -0.0893
   -0.2865   -0.0066    0.3730    1.0000    0.1949    0.2800   -0.2783   -0.1180    0.1357
   -0.2151   -0.2062    0.1508    0.1949    1.0000    0.0603   -0.2176    0.1960    0.4118
    0.1435    0.1547    0.2822    0.2800    0.0603    1.0000   -0.4625    0.1081    0.0126
    0.2147    0.1640    0.2144   -0.2783   -0.2176   -0.4625    1.0000    0.0610   -0.2465
   -0.0737    0.0313   -0.0188   -0.1180    0.1960    0.1081    0.0610    1.0000   -0.4574
   -0.0698   -0.0202   -0.0893    0.1357    0.4118    0.0126   -0.2465   -0.4574    1.0000];

%% Eref Distribution Parameters

%Double exponential decay distribution parameters
DistName_dexp={'logn';'logn';'logn';'logn'};
mu_dexp=[2.70 2.24 2.15 1.83;...%Ejump
    .0898 .442 .814 1.38;...%Esag
    4.44 4.15 3.88 3.66;...%tsag
    3.77 3.33 2.88 2.22];%t0
sig_dexp=[.396 .407 .492 .829;...%Ejump
    .549 .599 .594 .493;...;%Esag
    .263 .329 .471 .306;...%tsag
    .360 .443 .704 .799];%t0

Rho_sag{1}=[1.0000   -0.3088    0.3989    0.5276
   -0.3088    1.0000   -0.4835   -0.6705
    0.3989   -0.4835    1.0000    0.9234
    0.5276   -0.6705    0.9234    1.0000];
Rho_sag{2}=[1.0000    0.0558    0.3182    0.4164
    0.0558    1.0000   -0.1502   -0.5196
    0.3182   -0.1502    1.0000    0.8903
    0.4164   -0.5196    0.8903    1.0000];
Rho_sag{3}=[1.0000   -0.0375   -0.1135    0.1634
   -0.0375    1.0000   -0.7647   -0.8741
   -0.1135   -0.7647    1.0000    0.9329
    0.1634   -0.8741    0.9329    1.0000];
Rho_sag{4}=[1.0000   -0.3466    0.1548    0.8254
   -0.3466    1.0000   -0.2784   -0.5810
    0.1548   -0.2784    1.0000    0.6094
    0.8254   -0.5810    0.6094    1.0000];

Rho_nosag{1}=[1.0000   -0.4993
   -0.4993    1.0000];
Rho_nosag{2}=[1.0000   -0.1881
   -0.1881    1.0000];
Rho_nosag{3}=[1.0000   -0.0664
   -0.0664    1.0000];
Rho_nosag{4}=[1.0000    0.9983
    0.9983    1.0000];

%Mono exponential decay distribution parameters (drawn from single
%distribution)
DistName_mexp={'logn';'logn'};
mu_mexp=[2.72;...A
    2.67];%tau
sig_mexp=[.363;...A
    .313];%tau

nVarSag=numel(DistName_dexp);
nVarNoSag=numel(DistName_mexp);

%% Sag Probability
Psag=[0.3226;
    0.7586;
    0.6897;
    0.9362];

%% Randomly Assign Cells with E sag or no sag
CellSag_class=cell(nClass,1);
NSag=zeros(nClass,1);
NNoSag=zeros(nClass,1);
for k=1:nClass
    temp=rand(N(k),1);
    CellSag_class{k}=(temp<Psag(k));
    NSag(k)=sum(CellSag_class{k});
    NNoSag(k)=N(k)-NSag(k);
end

%% Generate Random Sample Excluding Eref Parameters
disp('Generate Random Sample: Non-Eref Parameters')
Data_copula_gen=cell(nClass,1);
Data_gen_class=cell(nClass,1);
for k=1:nClass 
    %Generate a random sample from the t copula
    Data_copula_gen{k}=copularnd('Gaussian',Rho{k},N(k));
    
    %Transform the random sample back to the original scale of the data
    Data_gen_class{k}=zeros(size(Data_copula_gen{k}));
    for j=1:nVar
        Data_gen_class{k}(:,j)=icdf(DistName{j},Data_copula_gen{k}(:,j),...
            mu(j,k),sig(j,k));
    end
end

%% Generate Random Sample of Eref Parameters
%Cells with sag
disp('Generate Random Sample: Eref Parameters - Cells with Sag')
Data_copula_gen_sag=cell(nClass,1);
Data_gen_class_sag=cell(nClass,1);
for k=1:nClass
    if NSag(k)>0
        %Generate a random sample from the Gaussian copula
        Data_copula_gen_sag{k}=copularnd('Gaussian',Rho_sag{k},NSag(k));

        %Transform the random sample back to the original scale of the data
        Data_gen_class_sag{k}=zeros(size(Data_copula_gen_sag{k}));
        for j=1:nVarSag
            Data_gen_class_sag{k}(:,j)=icdf(DistName_dexp{j},...
                Data_copula_gen_sag{k}(:,j),mu_dexp(j,k),sig_dexp(j,k));
        end
    end
end

%Cells with no sag
disp('Generate Random Sample: Eref Parameters - Cells with No Sag')
Data_copula_gen_nosag=cell(nClass,1);
Data_gen_class_nosag=cell(nClass,1);
for k=1:nClass
    if NNoSag(k)>0
        %Generate a random sample from the t copula
        Data_copula_gen_nosag{k}=copularnd('Gaussian',Rho_nosag{k},...
            NNoSag(k));

        %Transform the random sample back to the original scale of the data
        Data_gen_class_nosag{k}=zeros(size(Data_copula_gen_nosag{k}));
        for j=1:nVarNoSag
            Data_gen_class_nosag{k}(:,j)=icdf(DistName_mexp{j},...
                Data_copula_gen_nosag{k}(:,j),mu_mexp(j),sig_mexp(j));
        end
    end
end

%% Fit Double Exponential Parameters Cells' Sag Response
disp('Fit Double Exponential to Cells'' Sag Response')
betaE=cell(nClass,1);
Ejump=cell(nClass,1);
Esag=cell(nClass,1);
tsag=cell(nClass,1);
t0=cell(nClass,1);
for k=1:nClass
    betaE{k}(~CellSag_class{k},:)=[repmat([0 10],NNoSag(k),1),...
        Data_gen_class_nosag{k}];
    Ejump{k}=Data_gen_class_sag{k}(:,1);
    Esag{k}=Data_gen_class_sag{k}(:,2);
    tsag{k}=Data_gen_class_sag{k}(:,3);
    t0{k}=Data_gen_class_sag{k}(:,4);
end

ind_total=1;
Tpoints=cell(nClass,1);
Epoints=cell(nClass,1);
opts=optimset('Display', 'off');
gs=GlobalSearch('NumStageOnePoints',200,'NumTrialPoints',1000,...
    'StartPointsToRun','bounds-ineqs','Display', 'off');
warning off

dt=.05;t=(0:dt:300)';
func_dexp=@(x,t) -x(1)*exp(-t/x(2))+x(3)*exp(-t/x(4));
gs2=GlobalSearch('NumStageOnePoints',500,'NumTrialPoints',2000,...
    'StartPointsToRun','bounds-ineqs','Display', 'off');

for ClassInd=1:nClass
    ind=1;
    Tpoints{ClassInd}=zeros(N(ClassInd),3);
    Epoints{ClassInd}=zeros(N(ClassInd),3);    
    for k=1:N(ClassInd)
        if CellSag_class{ClassInd}(k)
            disp([' ',num2str(100*ind_total/sum(NSag)),'% Complete'])
            Tpoints{ClassInd}(k,:)=[0 t0{ClassInd}(ind) tsag{ClassInd}(ind)];
            Epoints{ClassInd}(k,:)=[Ejump{ClassInd}(ind) 0 -Esag{ClassInd}(ind)];
            func=@(x) sum((-x(1)*exp(-Tpoints{ClassInd}(k,:)/x(2)) +...
                x(3)*exp(-Tpoints{ClassInd}(k,:)/x(4)) -...
                Epoints{ClassInd}(k,:)).^2);
            c=@(x) (x(1)/x(2)^2)*((x(1)*x(4))/(x(3)*x(2)))^(-x(4)/(x(4)-x(2)))-...
                (x(3)/x(4)^2)*((x(1)*x(4))/(x(3)*x(2)))^(-x(2)/(x(4)-x(2)));
            ceq=@(x) [x(2)*x(4)*log((x(1)*x(4))/(x(3)*x(2)))/(x(4)-x(2))-...
                tsag{ClassInd}(ind);
                x(1)*exp(-tsag{ClassInd}(ind)/x(2))-...
                x(3)*exp(-tsag{ClassInd}(ind)/x(4))-Esag{ClassInd}(ind)];
            confun=@(x) deal(c(x),ceq(x));
            problem=createOptimProblem('fmincon',...
                'objective',func,...
                'x0',[.5*Ejump{ClassInd}(ind) .5*tsag{ClassInd}(ind) ...
                1.5*Ejump{ClassInd}(ind) .55*tsag{ClassInd}(ind)],...
                'lb',[0 0 0 0],...
                'ub',[Inf Inf Inf Inf],...
                'Aineq',[1 0 -1 0;0 -1 0 1],...
                'bineq',[0;0],...
                'Aeq',[-1 0 1 0],...
                'beq',Ejump{ClassInd}(ind),...
                'nonlcon',confun,...
                'options',opts);
    %             betaE{ClassInd}(k,:)=fmincon(problem);
            betaE{ClassInd}(k,:)=run(gs,problem);

            Espiketemp=func_dexp(betaE{ClassInd}(k,:),t);
            Esagtemp=-min(Espiketemp);
            if abs(Esag{ClassInd}(ind)-Esagtemp)>.2*Esag{ClassInd}(ind)
                problem=createOptimProblem('fmincon',...
                    'objective',func,...
                    'x0',[.5*Ejump{ClassInd}(ind)*(.9+.2*rand(1)) ...
                    .5*tsag{ClassInd}(ind)*(.9+.2*rand(1)) ...
                    1.5*Ejump{ClassInd}(ind)*(.9+.2*rand(1)) ...
                    .55*tsag{ClassInd}(ind)*(.9+.2*rand(1))],...
                    'lb',[0 0 0 0],...
                    'ub',[Inf Inf Inf Inf],...
                    'Aineq',[1 0 -1 0;0 -1 0 1],...
                    'bineq',[0;0],...
                    'Aeq',[-1 0 1 0],...
                    'beq',Ejump{ClassInd}(ind),...
                    'nonlcon',confun,...
                    'options',opts);
    %             betaE{ClassInd}(k,:)=fmincon(problem);
                betaE{ClassInd}(k,:)=run(gs2,problem);
            end
                        
            figure,plot(t,DoubleExp([0,-betaE{ClassInd}(k,1),betaE{ClassInd}(k,2:end)],t),Tpoints{ClassInd}(k,:),Epoints{ClassInd}(k,:),'.')
            ind=ind+1;ind_total=ind_total+1;
        end
    end
end

%% Store Data
for k=1:nClass
    Data_gen_class{k}=[Data_gen_class{k},betaE{k}];
end
Variables=[Variables_rEIF;'A1';'tau1';'A2';'tau2'];
end
